# Supplementary material for: FFGA1 Protein Is Essential for Regulating Vegetative Growth, Cell Wall Integrity, and Protection against Stress in Flammunina filiformis
Source: J Fungi (Basel). 2022 Apr 14;8(4):401. doi: 10.3390/jof8040401 (PMC9030616; doi:10.3390/jof8040401)
Supplement: Supplementary file 1 [file jof-08-00401-s001.zip › jof-1676105-supplementary.pdf]

Corresponding PCR fragments band size (FfGa1-OE 1891 bp, FfGa1-RNAi 660 bp) were observed in the selected transformants (OE1, OE2, Ri1, and Ri2), suggesting that the target gene fragments were stably inserted in the WT strain.

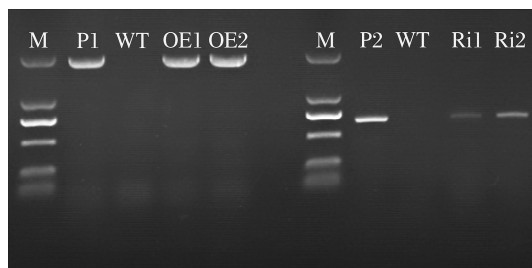

**Figure S1 PCR confirmation of the OE and RNAi transformants.** M represents DNA Marker DL2000; WT represents wild-type *F. filiformis* L11 strain; P1, represents plasmid FfGa1-OE; P2, represents plasmid FfGa1-RNAi.

The inhibition rate of WT cultured on PDA medium supplemented with 50% V/V *Trichoderma* spp.0018 culture broth was almost 37%, while, T5 with 75%V/V *Trichoderma* spp.0018 was too high, so we selected T4 with 50%V/V *Trichoderma* spp.0018 culture broth as treatment condition for further study.

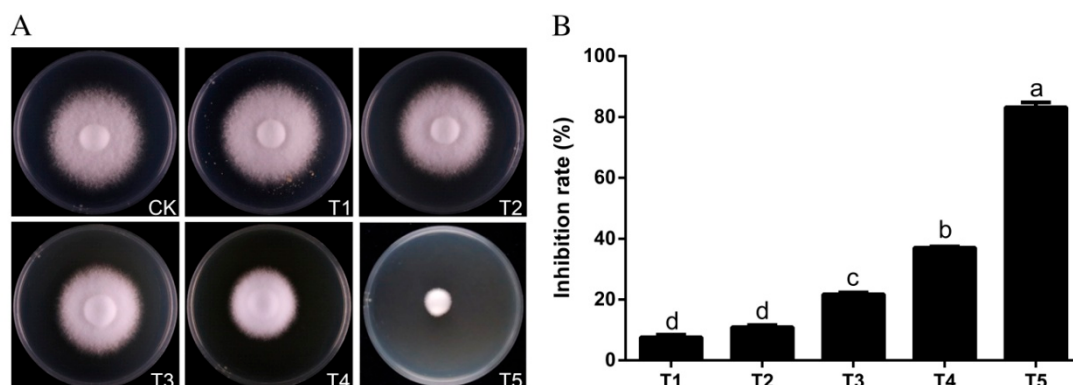

**Figure S2. Effect of fermentaion broth of *Trichoderma* sp. 0018 on mycelium growth rate in WT.** (A) Colony morphology of WT on PDA medium supplemented with *Trichoderma* sp.0018 fermentation broth. (B) Mycelial growth inhibition ratio of WT on PDA medium supplemented with *Trichoderma* sp.0018 fermentation broth CT represents PDA; T1: PDA with *Trichoderma* sp.0018 mycilium (0.5%); T2: PDA with *Trichoderma* sp.0018 fermentation broth (12.5%, v/v); T3: PDA with *Trichoderma* sp.0018 fermentation broth (25%, v/v); T4: PDA with *Trichoderma* sp.0018 fermentation broth (50%, v/v); T5: PDA with *Trichoderma* sp.0018 fermentation broth (75%, v/v). The letters “a”, “b”, “c” and “d” indicate statistically significant difference at 0.05 level between samples. Bars with no common letters are significantly different ( $p < 0.05$ ).

**Table S2** Insert fragment information of four *Flammulina filiformis* transformants

| Strain | T-DNA site<br>in vector | Location in<br>genome      | disrupted gene | Prediction protein                                                                | Sequence depth<br>of genome | Sequence depth of<br>insert fragment | Copy number* |
|--------|-------------------------|----------------------------|----------------|-----------------------------------------------------------------------------------|-----------------------------|--------------------------------------|--------------|
| OE1    | 5592-9902               | Chr04:<br>1962738-1963193  | gene205931     | RNI-like protein<br>[Hymenopellis radicata] (0, 62%)                              | 157                         | 131                                  | 1            |
| OE2    | 5591-9717               | Chr04:<br>19533323-1953745 | gene205925     | hypothetical protein<br>BDZ89DRAFT_1127734<br>[Hymenopellis radicata](7e-79, 66%) | 189                         | 146                                  | 1            |
| Ri1    | 5823-9222               | Chr08:<br>1450860-1450914  | gene210615     | hypothetical protein<br>ARMGADRAFT_1164320<br>[Armillaria gallica]( 1e-13,32%)    | 188                         | 153                                  | 1            |
| Ri2    | 5928-9223               | Chr08:<br>1500978-1502687  | gene210626     | chondroitin AC/alginate lyase<br>[Hymenopellis radicata](0,79%)                   | 152                         | 130                                  | 1            |

\*: Sequence depth of insert fragment / Sequence depth of genome
