# Supplementary material for: FFGA1 Protein Is Essential for Regulating Vegetative Growth, Cell Wall Integrity, and Protection against Stress in Flammunina filiformis
Source: J Fungi (Basel). 2022 Apr 14;8(4):401. doi: 10.3390/jof8040401 (PMC9030616; doi:10.3390/jof8040401)
Supplement: Supplementary file 1 [file jof-08-00401-s001.zip › Supplementary-Table S1.xls]

## Sheet: Sheet1
Primer pairs used in the study
Primer	F/R	Sequence (5'-3')	Function
qRAS	F:	TCAATGCGACGAGTAAAGAGAGG	qPCR primers of reference gene RAS
	R:	CATAGGTCCCACATCTACATTTCG
qGAPDH	F:	GTTTCCGTTGTTGACCTTGTGTGCC	qPCR primers of reference gene GAPDH
	R:	CGAAGTTGCCGTTGAGCTGGATAC
qFfGa1	F:	GAAGTCTACGGTGCTCAAAC	qPCR primers for the quantification of FfGa1
	R:	GGGCATAGCTTCAAGAATGG
qFfGa2	F:	ATCCCAAGTCAAGGTGCTATT	qPCR primers for the quantification of FfGa2
	R:	GAGAACGGTACCCGATGTATAAG
qFfGa3	F:	CTGACAGCGCCACATACTTC	qPCR primers for the quantification of FfGa3
	R:	TCCATTTCCGTCGTTCAGAG
qFfGa4	F:	CCTGAATACACTGGTGGGAATG	qPCR primers for the quantification of FfGa4
	R:	GGCCTGTGTTAAGTGTGGATAG
qHyd1	F:	GCAACAGCACCCAATCTAAC	qPCR primers for the quantification of Hyd1
	R:	CAAACCAACAAGACCAGTGATAG
qHyd2-3	F:	CCACGGGTTATGCTCCTAAAT	qPCR primers for the quantification of Hyd2-3
	R:	GGGAATAGGCTGCGTGTAAA
qHyd4	F:	GCTACCATCCTCGCTTTCAT	qPCR primers for the quantification of Hyd4
	R:	CCTTGTCGACTGAGGTAGTTT
qHyd5	F:	AGCCTCACGAGAAAGATCAAC	qPCR primers for the quantification of Hyd5
	R:	CAGGATGGCAACAGAGAACA
qHyd6	F:	CTGGCATCTTGGCCCTTT	qPCR primers for the quantification of Hyd6
	R:	CTCCCGAAGCTGTTGTTCTC
qHyd7	F:	TTCTGCCTTCTTGGTCCTTAC	qPCR primers for the quantification of Hyd7
	R:	GAAGAATCCTGGACGGTGTT
qHyd8	F:	GCCAGTGCAATGTTAGCAATC	qPCR primers for the quantification of Hyd8
	R:	ACGTTCACATCCTGGACAAC
qHyd9	F:	ATCGTCCTCCAGGATTTGAAC	qPCR primers for the quantification of Hyd9
	R:	GATCGGGATGCAACCAATAGA
qHyd10	F:	CTCTTGGGTCTTCTGGGAATTA	qPCR primers for the quantification of Hyd10
	R:	TCGCATCCGCTGTTCAAT
qCHS1	F:	CACGCCAATGAGGAAGAAATG	qPCR primers for the quantification of CHS1
	R:	AAGTACGGTCGGAGAGAGTAT
qCHS2	F:	ATCGCCTTCGTCATCCTTTC	qPCR primers for the quantification of CHS2
	R:	GAGCAGGCCCATGTAGAAATAA
qCHS3	F:	GCACGAAAGGGAGCGATAAA	qPCR primers for the quantification of CHS3
	R:	TGGAACTTGTGCGTGTCTTC
qCHS4	F:	GGCTACACCTACGACTTTACAC	qPCR primers for the quantification of CHS4
	R:	CCGCCTTCAATGAGAGGATTAG
qCHS5	F:	ACTCGTCTTGTTGCGGTATG	qPCR primers for the quantification of CHS5
	R:	GCTCGGGATTATCGCTGTTAG
qCHS6	F:	TCTCTCGCCGACGTATATCA	qPCR primers for the quantification of CHS6
	R:	CTCGGGTTCTTCTGCATCTT
qCHS7	F:	TCATCCTCTGACGGCTCTATC	qPCR primers for the quantification of CHS7
	R:	AGACTCTTCTCCCTCCGAATAG
qCHS8	F:	CCCGAAGGAGATTCGCAATAA	qPCR primers for the quantification of CHS8
	R:	GGCAGGAGGGAAATTGATGTA
VFfGa1-OE	F:	CACAACAACTTATCACTAGTCGAAGAACCGCCATGGGCTG	Primers for construction of OE expression vector
	R:	ATGCCAATTCTAGAGGGCCCAGGCCGATGATATTCCGAGG
VFfGa1RNAi-L	F:	CACAACAACTTATCACTAGTCGCCATTCTTGAAGCTATGC	Primers for construction of RNAi expression vector left fragment
	R:	AGTCTACCTCGAACCGTCTACTCACCATGTGTTTCAG
VFfGa1RNAi-W	F:	CTACTCACCATGTGTTTCAGACAACATTTGGTCGTACTC	Primers for construction of RNAi expression vector right fragment
	R:	ATGCCAATTCTAGAGGGCCCATGCTCGTCGTGCCGCCATC
RFfGa1	F:	GTCATTCTGTGTCAGGCTA	Primers for amplify RNAi fragment
	R:	ATCTTCGTACAACATTTGG
GBT	F:	CCCAGGCTTTACACTTTAT	Primer for amplify OE fragment together with VFfGa1-OER primer
